# Supplementary material for: Core Endophytic Bacteria and Their Roles in the Coralloid Roots of Cultivated Cycas revoluta (Cycadaceae)
Source: Microorganisms. 2023 Sep 21;11(9):2364. doi: 10.3390/microorganisms11092364 (PMC10537169; doi:10.3390/microorganisms11092364)
Supplement: Supplementary file 1 [file microorganisms-11-02364-s001.zip › Supplementary Table.xls]

## Sheet: Table S1
Table S1. Information and abbreviation of sampling localities.
Name of coralloid roots	Name of bulk soils	Localities	Longitude	Latitude
SZ	tSZ	Shenzhen, Guangdong Province	114.17	22.58
NN	tNN	Nanning, Guangxi Province	108.39	22.8
GZ	tGZ	Guangzhou, Guangdong Province	113.37	23.18
XM	tXM	Xiamen, Fujian Province	118.12	24.45
GL	tGL	Guilin, Guangxi Province	110.3	25.07
FZ	tFZ	Fuzhou, Fujian Province	119.3	26.16
PZH	tPZH	Panzhihua, Sichuan Province	101.72	26.59
YY	tYY	Yiyang, Hunan Province	112.33	28.6
HZ	tHZ	Hangzhou, Zhejiang Province	120.21	30.25
HG	tHG	Huanggang, Hubei Province	114.88	30.46
JZ	tJZ	Jinzhong, Shanxi Province	111.92	37.02

## Sheet: Table S2
Table S2. The top five COG functions of bacteria communities in coralloid roots of Cycas revoluta from Different sites.
COG function	COG description	FZ	GL	GZ	HG	HZ	JZ	NN	PZH	SZ	XM	YY
Amino acid transport and metabolism	glyoxalase bleomycin resistance protein dioxygenase	15078.5	14874.5	15613.4	14988.3	14809.4	15464.9	15509.1	15335	15402	15745.1	15034.5
	aminotransferase	10798.1	9952.96	12465.8	10969.3	9881.61	10611	13299.8	10246.9	13170.1	11489.8	11011
	Dehydrogenase	11316.8	9949.48	10914.8	10247.1	9888.33	10316.4	11112.8	10190.6	10975.1	12210.2	11730.6
	(ABC) transporter	10709	8384.15	10662	9167.72	8263.32	9115.08	11189.3	8107.17	11073.2	11796.6	11399.7
	cysteine biosynthetic process from serine	9466.8	8237.41	10168.1	9131.09	8217.22	8482.78	11007.5	8144.14	10936.9	9636.63	9863.96
Inorganic ion transport and metabolism	phosphate abc transporter	15221.5	13107.9	17334.6	15315.1	13120	12895.2	19571.9	13429.7	19657.1	16662.5	16002.2
	(ABC) transporter	16124.8	14886.3	12647.7	13536.3	14810.1	15310.7	11103.4	15268.9	11043.8	17210.7	16483.5
	(ABC) transporter	12055.8	11611.6	14449.6	12810.5	11532.4	12070.5	15416.9	11913.4	15356.8	12680	12120.1
	rieske 2fe-2S domain-containing protein	12871.1	9926.09	12190.5	10965.9	9872.43	10162.6	13214.5	9988.05	13155.3	14050.6	13865.3
	Sodium hydrogen exchanger	11744.9	9866.43	12097.4	10952.9	9855.31	9879.89	13111.4	10139.2	13136.4	12885.1	12396.5
Energy production and conversion	Aldo keto reductase	17846.2	16487	17505.3	16796.2	16440.9	17076	17660.9	16802.1	17557.9	18754.2	18278.7
	Ferredoxin	16461.3	14754.3	14992.5	14951.6	14761.1	14526.4	15233.6	14615.6	15305.1	17193.9	17094.6
	Catalyzes the hydroxylation of the N(6)-(4-aminobutyl)- L-lysine intermediate to form hypusine, an essential post- translational modification only found in mature eIF-5A factor (By similarity)	14640.7	13077.3	14305.1	13848.3	13110.3	12672.9	15169.7	13220.9	15200.9	15589.9	15253.9
	nitrogenase	12347.3	11447.5	12361.6	12027.4	11474.1	11084	13003.8	11547.6	13097.5	12969.3	12712.2
	Dehydrogenase	10980.6	10062.9	12995.8	11004.2	9923.92	11335.1	13565.4	10265.9	13291.1	11587.1	11106.6
Cell wall/membrane/envelope biogenesis	Glycosyl transferase (Group 1	18080.6	16621.5	21054.4	18292.5	16484.2	18003.4	22317.4	17143.2	22028	19206	18397.8
	Nad-dependent epimerase dehydratase	17998.5	16584	20879.7	18280.1	16472.2	17681.3	22225.5	17093	22002.3	19146.7	18356.4
	Glycosyl transferase, family 2	17799.8	16463.9	20312	18245.4	16424.6	16887.7	21938.6	16918.5	21898.9	19050.6	18239
	Glycosyl transferase, family 2	16219.7	16480.6	18747.7	17529.1	16435.5	16475.7	19735.9	16866.1	19728.6	16868.8	16091
	Glycosyl transferase, family 2	9973.2	8252.99	13068.6	10580.7	8216.62	8458.42	15296	8446.32	15320.8	10977.4	10572.6
Signal transduction mechanisms	Histidine kinase	18082.3	16614	21062.4	18293.9	16482.2	18020.4	22310.1	17151.7	22028.7	19196	18401.1
	regulatoR	18052.7	16603.9	20925.2	18294.2	16480.6	17736.7	22247.2	17128.9	22017.3	19174	18378.4
	Two component transcriptional regulator, LuxR family	17974.6	16565.9	20584	18286.3	16470.8	17240.2	22062.6	17016	21958.8	19127.1	18337.1
	Serine Threonine protein kinase	17818.7	16422	19959.2	18259.9	16429.3	16602.5	21896.3	16888.1	21891.7	19081.4	18276
	Adenylate guanylate Cyclase	16045.2	16357.4	19718.4	18223.8	16391	15847	21664.4	16234.7	21780.1	16790.5	15996.2

## Sheet: Table S3
Table S3. The top five COG functions of bacteria communities in bulk soils of Cycas revoluta from Different sites.
COG Function	COG Description	tFZ	tGL	tGZ	tHG	tHZ	tJZ	tNN	tPZH	tSZ	tXM	tYY
Amino acid transport and metabolism	glyoxalase bleomycin resistance protein dioxygenase	32957.3	24878	31201.7	26688.3	32903.1	27789.7	34270.8	26209.3	30641.7	25779.3	27448.6
	succinyl-diaminopimelate desuccinylase activity	29370.1	28407.2	29225.5	28091	31319.2	28042.7	27883.7	28901.7	29293.5	29366.3	27213.7
	amino acid	32232.9	24260.9	28622.3	25261.7	30011.9	24856.5	31733.8	23733	27642	25196.1	24899.2
	aminotransferase	25239	26522.5	24270.5	23649.3	22532.7	23913.5	25135.1	24335.5	22880.2	25142.4	25678.7
	Extracellular solute-binding protein, family 5	25483.8	20188.3	23017.5	24355.8	27065.6	25502.3	24683.2	24704.5	24603.9	22217.6	22621.7
Energy production and conversion	Dehydrogenase	46591.7	38179.4	41495.9	40974.7	43900.3	43962.8	43741.1	41757.2	40879	40331.8	43303.7
	alcohol dehydrogenase	33716	28494	34100.2	30584.6	36842.3	30834.2	33489	30499	33068.9	29838	27909.8
	Monooxygenase	36565.4	22349.2	31782.1	31629.8	39459.2	31737.9	35056.8	28801.3	33560.1	24605.5	26616
	Aldo keto reductase	29246	25765.4	28968.9	27608.1	32237.1	30072.6	30645	27680.4	29562.3	27544.7	25227
	FAD linked oxidase domain protein	28723	25610.8	29829.6	28171.7	33508.6	27264.7	27886.5	28477.4	30188.8	26437.5	24547
Translation, ribosomal structure and biogenesis	Allows the formation of correctly charged Gln-tRNA(Gln) through the transamidation of misacylated Glu-tRNA(Gln) in organisms which lack glutaminyl-tRNA synthetase. The reaction takes place in the presence of glutamine and ATP through an activated gamma-phospho-Glu-tRNA(Gln) (By similarity)	22270.9	23540	25491.4	23474.6	27247.3	21199.2	21801.1	23779.3	26390	24345.7	20301.9
	Endoribonuclease LPSP	17128	21507.9	19961.3	18411.5	19537.1	19308.3	19009.3	19231.4	19288.8	20269.4	18672.4
	Methyltransferase	13700.9	10869	12291.3	12661.4	13708.3	13459.1	11943.8	12706.3	12669.5	11760.3	12278.1
	Catalyzes the methylthiolation of N6- (dimethylallyl)adenosine (i(6)A), leading to the formation of 2- methylthio-N6-(dimethylallyl)adenosine (ms(2)i(6)A) at position 37 in tRNAs that read codons beginning with uridine (By similarity)	11423.7	12732.2	11656.2	11118	10530.1	11434.6	11553.4	12418	11336.9	12403.2	12386
	pseudouridine synthase activity	12839.5	11193.4	11343.5	10686.3	10345.8	12645.2	13526.2	10850.5	10688.8	11033.7	13124
Transcription	RNA Polymerase	49013.8	46697.6	49770.9	48120	51217.8	48521.6	49031.4	50331.6	49871.2	49378.5	48506.6
	Transcriptional regulator	52489.1	41271.7	48736.2	45877.2	50774.4	47473.4	50129	43830	48494.3	43168.3	45344.6
	Transcriptional regulator	45232.7	36281.8	40707	38116.2	42294	41615.2	44641.2	37406	39857.2	37363.6	41094.3
	Transcriptional regulator	47041.6	32804.6	41989.6	39380.4	45469.5	39753.8	45138.2	36504.7	41697.2	34992.5	38323.6
	Transcriptional regulator, arsr family	38345.9	27592.9	36968.5	31840.6	39516.3	30322.9	38081.4	30012.8	36500.1	30762.2	30641.1
Carbohydrate transport and metabolism	Major Facilitator	54611.4	45337.4	50866.4	48911.2	53692.9	50444.5	51760.4	48810.6	52109.3	47474.5	49689.2
	transporter activity	31083.8	16828.1	25232.8	25452.1	32124.2	25494.4	30805.3	22890.7	28473	19524.5	21244.8
	pfkb domain protein	27053.1	21404.4	25670.2	24149.1	28756	24574	27956	24421.6	27085	23646.8	23236.5
	Binding-protein-dependent transport systems inner membrane component	28227.8	14758.1	21995.5	22922.9	28450.9	23570.2	27905.1	20425.6	24549.7	17231.3	19099.8
	ROK family	23446.8	15515.1	22371.5	23445.8	27842	23239.8	21276.6	21256.7	24678.4	20305.6	18738

## Sheet: Table S4
Table S4. Degree of endophytic bacteria in network analyses.
Node	Degree
Edaphobacter	54
Niastella	54
norank_f__norank_o__Subgroup_17	54
Nordella	54
SH-PL14	54
Virgisporangium	54
Aliihoeflea	44
Aurantimonas	44
Bosea	44
Brevundimonas	44
Fimbriiglobus	44
Hydrogenophaga	44
Mesorhizobium	44
Pir4_lineage	44
Polaromonas	44
Pseudorhodoferax	44
Sphingobium	44
Sphingopyxis	44
Subgroup_10	44
Truepera	44
UTCFX1	44
Vicinamibacter	44
Arenimonas	35
Chitinophaga	35
Flavobacterium	35
Mucilaginibacter	35
Aquicella	33
Pseudoxanthomonas	21
Altererythrobacter	19
Conexibacter	19
Herminiimonas	19
Luteimonas	19
Lysobacter	19
Sorangium	19
Variovorax	17
Chryseolinea	16
Streptomyces	16
Steroidobacter	12
Caulobacter	11
Devosia	11
Dyella	11
Methylobacterium-Methylorubrum	11
Chryseobacterium	10
Dongia	10
Phenylobacterium	10
Candidatus_Uzinura	8
Dokdonella	8
Filimonas	8
Hymenobacter	8
Xanthomonas	8
Achromobacter	7
Blautia	7
Bryobacter	7
Curtobacterium	7
Haliangium	7
Labrys	7
NS4_marine_group	7
Psychrobacter	7
Tahibacter	7
Lautropia	6
Nodosilinea	6
Phycicoccus	6
Bacillus	5
Corynebacterium	5
Cutibacterium	5
RB41	5
Staphylococcus	5
Hyphomicrobium	4
Kutzneria	4
Novosphingobium	4
Pseudomonas	4
Aquisphaera	3
Rhodanobacter	3
Rudaea	3
Schlesneria	3
Candidatus_Berkiella	2
Fodinicola	2
Haemophilus	2
Klenkia	2
Puia	2
Serratia	2
Acidibacter	1
Allorhizobium-Neorhizobium-Pararhizobium-Rhizobium	1
Amycolatopsis	1
Mycobacterium	1
Ralstonia	1
Rhodoplanes	1
Sphingomonas	1
Stenotrophomonas	1
Tolypothrix	1

## Sheet: Table S5
Table S5. Correlation coefficient between the core endophytic bacteria and other microorganisms detected by network analyses.
Node1	Node2	R	P
Edaphobacter	Niastella	1	0
Edaphobacter	SH-PL14	0.999512	3.11392e-48
Edaphobacter	Virgisporangium	0.999512	3.11392e-48
Edaphobacter	Nordella	0.998047	6.59566e-39
Edaphobacter	Dokdonella	0.829283	4.95795e-08
Edaphobacter	Chryseolinea	0.816599	1.34202e-07
Edaphobacter	Variovorax	0.803368	1.82739e-08
Edaphobacter	Streptomyces	0.729537	1.46005e-06
Edaphobacter	Aliihoeflea	0.71807	3.24947e-05
Edaphobacter	Aurantimonas	0.71807	3.24947e-05
Edaphobacter	Bosea	0.71807	3.24947e-05
Edaphobacter	Brevundimonas	0.71807	3.24947e-05
Edaphobacter	Fimbriiglobus	0.71807	2.54259e-06
Edaphobacter	Hydrogenophaga	0.71807	2.54259e-06
Edaphobacter	Mesorhizobium	0.71807	2.54259e-06
Edaphobacter	Pedomicrobium	0.71807	2.54259e-06
Edaphobacter	Pir4_lineage	0.71807	2.54259e-06
Edaphobacter	Polaromonas	0.71807	2.54259e-06
Edaphobacter	Pseudorhodoferax	0.71807	2.54259e-06
Edaphobacter	Sphingobium	0.71807	2.54259e-06
Edaphobacter	Sphingopyxis	0.71807	2.54259e-06
Edaphobacter	Subgroup_10	0.71807	2.54259e-06
Edaphobacter	Truepera	0.71807	2.54259e-06
Edaphobacter	UTCFX1	0.71807	2.54259e-06
Edaphobacter	Vicinamibacter	0.71807	2.54259e-06
Edaphobacter	Altererythrobacter	0.673191	0.000163272
Edaphobacter	Conexibacter	0.673191	0.000163272
Edaphobacter	Herminiimonas	0.673191	1.76371e-05
Edaphobacter	Luteimonas	0.673191	1.76371e-05
Edaphobacter	Lysobacter	0.673191	1.76371e-05
Edaphobacter	Sorangium	0.673191	1.76371e-05
Edaphobacter	Steroidobacter	0.661642	2.75563e-05
Niastella	SH-PL14	0.999512	3.11392e-48
Niastella	Virgisporangium	0.999512	3.11392e-48
Niastella	Nordella	0.998047	6.59566e-39
Niastella	Dokdonella	0.829283	4.95795e-08
Niastella	Chryseolinea	0.816599	1.34202e-07
Niastella	Variovorax	0.803368	1.82739e-08
Niastella	Streptomyces	0.729537	1.46005e-06
Niastella	Aliihoeflea	0.71807	3.24947e-05
Niastella	Aurantimonas	0.71807	3.24947e-05
Niastella	Bosea	0.71807	3.24947e-05
Niastella	Brevundimonas	0.71807	3.24947e-05
Niastella	Fimbriiglobus	0.71807	3.24947e-05
Niastella	Hydrogenophaga	0.71807	3.24947e-05
Niastella	Mesorhizobium	0.71807	3.24947e-05
Niastella	Pedomicrobium	0.71807	2.54259e-06
Niastella	Pir4_lineage	0.71807	2.54259e-06
Niastella	Polaromonas	0.71807	2.54259e-06
Niastella	Pseudorhodoferax	0.71807	2.54259e-06
Niastella	Sphingobium	0.71807	2.54259e-06
Niastella	Sphingopyxis	0.71807	2.54259e-06
Niastella	Subgroup_10	0.71807	2.54259e-06
Niastella	Truepera	0.71807	2.54259e-06
Niastella	UTCFX1	0.71807	2.54259e-06
Niastella	Vicinamibacter	0.71807	2.54259e-06
Niastella	Altererythrobacter	0.673191	0.000163272
Niastella	Conexibacter	0.673191	0.000163272
Niastella	Herminiimonas	0.673191	0.000163272
Niastella	Luteimonas	0.673191	0.000163272
Niastella	Lysobacter	0.673191	0.000163272
Niastella	Sorangium	0.673191	1.76371e-05
Niastella	Steroidobacter	0.661642	2.75563e-05
Nordella	SH-PL14	0.999512	3.11392e-48
Nordella	Virgisporangium	0.999512	3.11392e-48
Nordella	Dokdonella	0.827663	5.59717e-08
Nordella	Chryseolinea	0.814169	1.60341e-07
Nordella	Variovorax	0.800128	2.29787e-08
Nordella	Streptomyces	0.728112	1.56659e-06
Nordella	Altererythrobacter	0.71807	3.24947e-05
Nordella	Conexibacter	0.71807	3.24947e-05
Nordella	Herminiimonas	0.71807	3.24947e-05
Nordella	Luteimonas	0.71807	3.24947e-05
Nordella	Lysobacter	0.71807	3.24947e-05
Nordella	Sorangium	0.71807	2.54259e-06
Nordella	Aliihoeflea	0.673191	0.000163272
Nordella	Aurantimonas	0.673191	0.000163272
Nordella	Bosea	0.673191	0.000163272
Nordella	Brevundimonas	0.673191	0.000163272
Nordella	Fimbriiglobus	0.673191	0.000163272
Nordella	Hydrogenophaga	0.673191	0.000163272
Nordella	Mesorhizobium	0.673191	0.000163272
Nordella	Pedomicrobium	0.673191	1.76371e-05
Nordella	Pir4_lineage	0.673191	1.76371e-05
Nordella	Polaromonas	0.673191	1.76371e-05
Nordella	Pseudorhodoferax	0.673191	1.76371e-05
Nordella	Sphingobium	0.673191	1.76371e-05
Nordella	Sphingopyxis	0.673191	1.76371e-05
Nordella	Subgroup_10	0.673191	1.76371e-05
Nordella	Truepera	0.673191	1.76371e-05
Nordella	UTCFX1	0.673191	1.76371e-05
Nordella	Vicinamibacter	0.673191	1.76371e-05
Nordella	Steroidobacter	0.662937	2.62365e-05
SH-PL14	Virgisporangium	1	0
SH-PL14	Dokdonella	0.828878	5.11119e-08
SH-PL14	Chryseolinea	0.815783	1.42441e-07
SH-PL14	Variovorax	0.80214	1.99416e-08
SH-PL14	Streptomyces	0.729181	1.48606e-06
SH-PL14	Aliihoeflea	0.695971	7.4316e-05
SH-PL14	Altererythrobacter	0.695971	7.4316e-05
SH-PL14	Aurantimonas	0.695971	7.4316e-05
SH-PL14	Bosea	0.695971	7.4316e-05
SH-PL14	Brevundimonas	0.695971	7.4316e-05
SH-PL14	Conexibacter	0.695971	7.4316e-05
SH-PL14	Fimbriiglobus	0.695971	7.4316e-05
SH-PL14	Herminiimonas	0.695971	7.4316e-05
SH-PL14	Hydrogenophaga	0.695971	7.4316e-05
SH-PL14	Luteimonas	0.695971	7.4316e-05
SH-PL14	Lysobacter	0.695971	7.4316e-05
SH-PL14	Mesorhizobium	0.695971	7.4316e-05
SH-PL14	Pedomicrobium	0.695971	7.4316e-05
SH-PL14	Pir4_lineage	0.695971	7.4316e-05
SH-PL14	Polaromonas	0.695971	7.4316e-05
SH-PL14	Pseudorhodoferax	0.695971	7.4316e-05
SH-PL14	Sorangium	0.695971	6.89067e-06
SH-PL14	Sphingobium	0.695971	6.89067e-06
SH-PL14	Sphingopyxis	0.695971	6.89067e-06
SH-PL14	Subgroup_10	0.695971	6.89067e-06
SH-PL14	Truepera	0.695971	6.89067e-06
SH-PL14	UTCFX1	0.695971	6.89067e-06
SH-PL14	Vicinamibacter	0.695971	6.89067e-06
SH-PL14	Steroidobacter	0.662613	2.65611e-05
Virgisporangium	Dokdonella	0.828878	5.11119e-08
Virgisporangium	Chryseolinea	0.815783	1.42441e-07
Virgisporangium	Variovorax	0.80214	3.8452e-07
Virgisporangium	Streptomyces	0.729181	2.80287e-05
Virgisporangium	Aliihoeflea	0.695971	7.4316e-05
Virgisporangium	Altererythrobacter	0.695971	7.4316e-05
Virgisporangium	Aurantimonas	0.695971	7.4316e-05
Virgisporangium	Bosea	0.695971	7.4316e-05
Virgisporangium	Brevundimonas	0.695971	7.4316e-05
Virgisporangium	Conexibacter	0.695971	7.4316e-05
Virgisporangium	Fimbriiglobus	0.695971	7.4316e-05
Virgisporangium	Herminiimonas	0.695971	7.4316e-05
Virgisporangium	Hydrogenophaga	0.695971	7.4316e-05
Virgisporangium	Luteimonas	0.695971	7.4316e-05
Virgisporangium	Lysobacter	0.695971	7.4316e-05
Virgisporangium	Mesorhizobium	0.695971	7.4316e-05
Virgisporangium	Pedomicrobium	0.695971	7.4316e-05
Virgisporangium	Pir4_lineage	0.695971	7.4316e-05
Virgisporangium	Polaromonas	0.695971	7.4316e-05
Virgisporangium	Pseudorhodoferax	0.695971	7.4316e-05
Virgisporangium	Sorangium	0.695971	7.4316e-05
Virgisporangium	Sphingobium	0.695971	7.4316e-05
Virgisporangium	Sphingopyxis	0.695971	7.4316e-05
Virgisporangium	Subgroup_10	0.695971	7.4316e-05
Virgisporangium	Truepera	0.695971	7.4316e-05
Virgisporangium	UTCFX1	0.695971	7.4316e-05
Virgisporangium	Vicinamibacter	0.695971	7.4316e-05
Virgisporangium	Steroidobacter	0.662613	0.000242724
